# Supplementary material
Source: Springer Nature journal article supplement (https://www.springermedizin.de/resource/supplementary/12882_2013_736_MOESM1_ESM.pdf/9454590)
Supplement: MOESM1 [file 9454590]

Patients entered  
CKD clinic  
N=1741

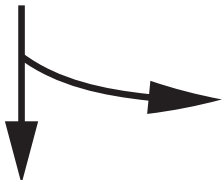

Patients included  
in study  
N=322

Excluded N=1442

No modality education (N=574)  
Discharged from CKD clinic (N=144)  
Transferred to other centre (N=15)  
Alive not on dialysis (N=357)  
Died prior to dialysis initiation (N=159)  
Intended pre-emptive transplant (N=42)  
Initiated dialysis within 20 days (N=84)  
Modality decision prior to clinic entry (N=67)
